# Supplementary material for: Automatic analysis and 3D-modelling of Hi-C data using TADbit reveals structural features of the fly chromatin colors
Source: PubMed Central journal article supplement (PMC5540598; doi:10.1371/journal.pcbi.1005665), 2017-07-19

**Figure S4. 3D models of selected domains in the *Drosophila* genome.**

Superimposed 3D structures for selected models in cluster #1 for each of the 50 modeled domains. Models are colored by their particle chromatin type as previously defined [1]. They can be directly visualized using TADkit by visiting the Web site [http://www.3DGenomes.org/datasets/serra\\_etal](http://www.3DGenomes.org/datasets/serra_etal).

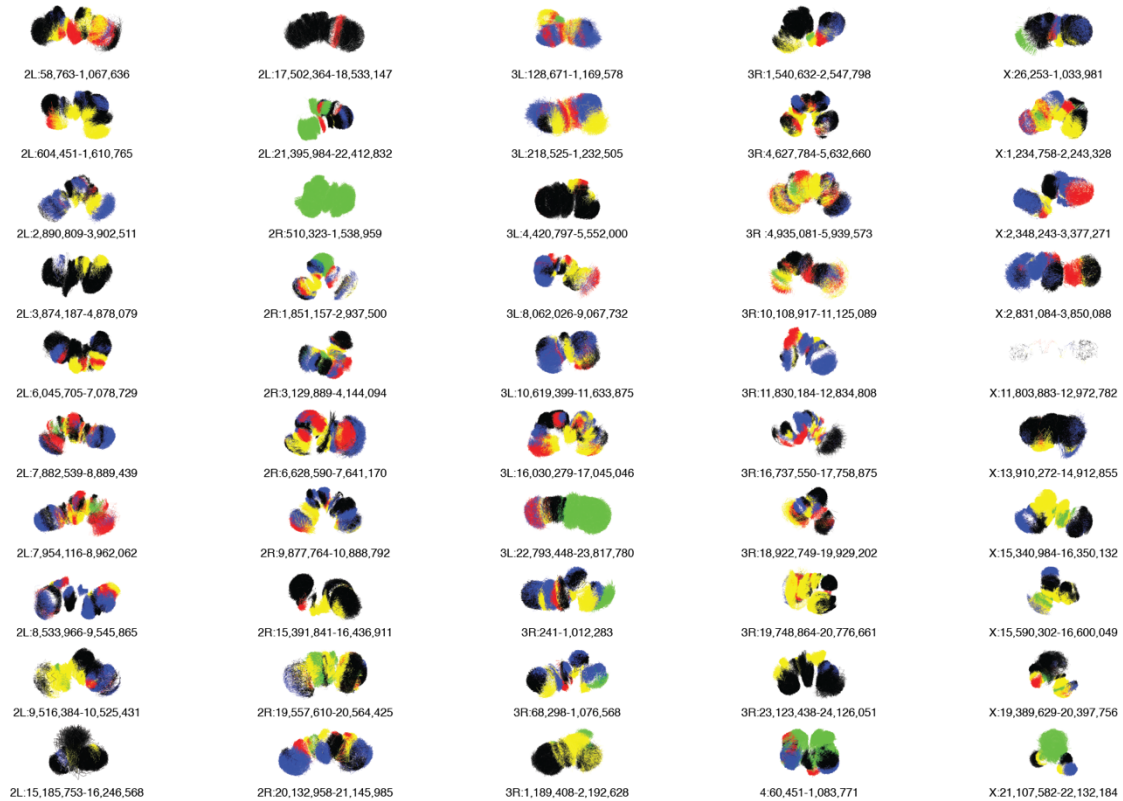

Supplement: pcbi.1005665.s004.pdf [file pcbi.1005665.s004.pdf]
