# Supplementary material for: Automatic analysis and 3D-modelling of Hi-C data using TADbit reveals structural features of the fly chromatin colors
Source: PubMed Central journal article supplement (PMC5540598; doi:10.1371/journal.pcbi.1005665), 2017-07-19
Supplement: pcbi.1005665.s005.pdf [file pcbi.1005665.s005.pdf]

**Table S1. Selected 50 regions of the *Drosophila melanogaster* genome for modeling.** Columns in the table correspond to: Chromosome, starting coordinate, end coordinate, size of the region (in Mb), index number of the first bin (10Kb bins), index number of the last bin, size of the region (in bins), fraction of the different colors (white, red, yellow, green, blue and black), MMP score [2] of the interaction matrix, correlation coefficient of the contact map of the final models and the initial interaction matrix, TADbit parameters for the modeling (including, scale, lower distance, lower cut-off, upper cut-off, and distance cut-off). Description of the parameters can be found in the main text.

| R# | Chr.  | Start coordinate | End coordinate | Size (Mb) | Start bin | End bin | Bin size | Fraction white | Fraction red | Fraction yellow | Fraction green | Fraction blue | Fraction black | MMP Score | Corre. Hi-C | Scale | Lower dist | Lower cutoff | Upper cutoff | Dist. cutoff |
|----|-------|------------------|----------------|-----------|-----------|---------|----------|----------------|--------------|-----------------|----------------|---------------|----------------|-----------|-------------|-------|------------|--------------|--------------|--------------|
| 1  | chr2L | 58,763           | 1,067,636      | 1.01      | 5         | 106     | 102      | 0.04           | 0.16         | 0.28            | 0.00           | 0.05          | 0.47           | 0.93      | 0.90        | 0.01  | 400        | 0.0          | -0.6         | 3            |
| 2  | chr2L | 604,451          | 1,610,765      | 1.01      | 60        | 161     | 102      | 0.01           | 0.05         | 0.13            | 0.00           | 0.11          | 0.71           | 0.95      | 0.91        | 0.01  | 400        | -0.3         | -0.9         | 3            |
| 3  | chr2L | 2,890,809        | 3,902,511      | 1.01      | 289       | 390     | 102      | 0.10           | 0.03         | 0.18            | 0.00           | 0.31          | 0.38           | 0.87      | 0.89        | 0.01  | 400        | 0.3          | -0.9         | 3            |
| 4  | chr2L | 3,874,187        | 4,878,079      | 1.00      | 387       | 487     | 101      | 0.03           | 0.00         | 0.07            | 0.00           | 0.02          | 0.88           | 0.94      | 0.89        | 0.01  | 300        | -0.3         | -0.6         | 2            |
| 5  | chr2L | 6,045,705        | 7,078,729      | 1.03      | 604       | 707     | 104      | 0.04           | 0.01         | 0.29            | 0.01           | 0.12          | 0.54           | 0.90      | 0.89        | 0.01  | 400        | 0.0          | -0.9         | 3            |
| 6  | chr2L | 7,882,539        | 8,889,439      | 1.01      | 788       | 888     | 101      | 0.07           | 0.16         | 0.18            | 0.08           | 0.26          | 0.26           | 0.91      | 0.88        | 0.01  | 400        | 0.0          | -0.6         | 3            |
| 7  | chr2L | 7,954,116        | 8,962,062      | 1.01      | 795       | 896     | 102      | 0.09           | 0.16         | 0.19            | 0.08           | 0.24          | 0.24           | 0.91      | 0.90        | 0.01  | 400        | 0.0          | -0.6         | 3            |
| 8  | chr2L | 8,533,966        | 9,545,865      | 1.01      | 853       | 954     | 102      | 0.08           | 0.07         | 0.04            | 0.00           | 0.35          | 0.46           | 0.89      | 0.91        | 0.01  | 400        | 0.0          | -0.6         | 3            |
| 9  | chr2L | 9,516,384        | 10,525,431     | 1.01      | 951       | 1052    | 102      | 0.06           | 0.05         | 0.32            | 0.01           | 0.13          | 0.43           | 0.90      | 0.87        | 0.01  | 400        | 0.0          | -1.2         | 3            |
| 10 | chr2L | 15,185,753       | 16,246,568     | 1.06      | 1518      | 1624    | 107      | 0.01           | 0.00         | 0.05            | 0.00           | 0.03          | 0.92           | 0.92      | 0.92        | 0.01  | 300        | -0.3         | -0.9         | 2            |
| 11 | chr2L | 17,502,364       | 18,533,147     | 1.03      | 1750      | 1853    | 104      | 0.01           | 0.01         | 0.00            | 0.00           | 0.00          | 0.98           | 0.88      | 0.92        | 0.01  | 200        | 0.0          | 0.0          | 2            |
| 12 | chr2L | 21,395,984       | 22,412,832     | 1.02      | 2139      | 2241    | 103      | 0.04           | 0.03         | 0.01            | 0.41           | 0.18          | 0.33           | 0.94      | 0.92        | 0.01  | 400        | 0.0          | -0.9         | 3            |
| 13 | chr2R | 510,323          | 1,538,959      | 1.03      | 51        | 153     | 103      | 0.00           | 0.00         | 0.00            | 1.00           | 0.00          | 0.00           | 0.85      | 0.88        | 0.01  | 400        | 0.0          | -0.9         | 3            |
| 14 | chr2R | 1,851,157        | 2,937,500      | 1.09      | 185       | 293     | 102      | 0.07           | 0.07         | 0.21            | 0.23           | 0.20          | 0.23           | 0.91      | 0.86        | 0.01  | 400        | 0.0          | -0.6         | 3            |
| 15 | chr2R | 3,129,889        | 4,144,094      | 1.01      | 312       | 414     | 103      | 0.07           | 0.12         | 0.36            | 0.04           | 0.17          | 0.25           | 0.90      | 0.85        | 0.01  | 400        | 0.0          | -0.6         | 3            |
| 16 | chr2R | 6,628,590        | 7,641,170      | 1.01      | 662       | 764     | 103      | 0.04           | 0.13         | 0.15            | 0.00           | 0.29          | 0.40           | 0.90      | 0.87        | 0.01  | 400        | 0.0          | -0.6         | 3            |
| 17 | chr2R | 9,877,764        | 10,888,792     | 1.01      | 987       | 1088    | 102      | 0.08           | 0.10         | 0.21            | 0.00           | 0.30          | 0.31           | 0.92      | 0.87        | 0.01  | 400        | 0.0          | -0.3         | 3            |
| 18 | chr2R | 15,391,841       | 16,436,911     | 1.05      | 1539      | 1643    | 102      | 0.01           | 0.02         | 0.07            | 0.00           | 0.01          | 0.89           | 0.94      | 0.90        | 0.01  | 300        | -0.3         | -0.6         | 2            |
| 19 | chr2R | 19,557,610       | 20,564,425     | 1.01      | 1955      | 2056    | 102      | 0.06           | 0.03         | 0.40            | 0.06           | 0.13          | 0.32           | 0.91      | 0.89        | 0.01  | 400        | 0.0          | -0.6         | 3            |
| 20 | chr2R | 20,132,958       | 21,145,985     | 1.01      | 2013      | 2114    | 102      | 0.07           | 0.06         | 0.17            | 0.03           | 0.39          | 0.28           | 0.93      | 0.90        | 0.01  | 400        | 0.0          | -0.9         | 3            |
| 21 | chr3L | 128,671          | 1,169,578      | 1.04      | 12        | 116     | 105      | 0.09           | 0.11         | 0.22            | 0.02           | 0.44          | 0.12           | 0.92      | 0.88        | 0.01  | 400        | 0.0          | -0.9         | 3            |
| 22 | chr3L | 218,525          | 1,232,505      | 1.01      | 21        | 123     | 103      | 0.08           | 0.11         | 0.17            | 0.00           | 0.52          | 0.13           | 0.93      | 0.89        | 0.01  | 300        | 0.0          | -0.6         | 2            |
| 23 | chr3L | 4,420,797        | 5,552,000      | 1.13      | 442       | 555     | 114      | 0.02           | 0.04         | 0.04            | 0.02           | 0.04          | 0.86           | 0.91      | 0.90        | 0.01  | 300        | -0.3         | -0.6         | 2            |
| 24 | chr3L | 8,062,026        | 9,067,732      | 1.01      | 806       | 906     | 101      | 0.09           | 0.09         | 0.25            | 0.00           | 0.21          | 0.37           | 0.87      | 0.87        | 0.01  | 400        | 0.0          | -0.9         | 3            |
| 25 | chr3L | 10,619,399       | 11,633,875     | 1.01      | 1061      | 1163    | 103      | 0.08           | 0.15         | 0.17            | 0.00           | 0.44          | 0.17           | 0.93      | 0.85        | 0.01  | 300        | 0.0          | -0.6         | 2            |
| 26 | chr3L | 16,030,279       | 17,045,046     | 1.01      | 1603      | 1704    | 102      | 0.04           | 0.09         | 0.31            | 0.00           | 0.16          | 0.40           | 0.86      | 0.85        | 0.01  | 400        | 0.0          | -0.9         | 3            |
| 27 | chr3L | 22,793,448       | 23,817,780     | 1.02      | 2279      | 2381    | 103      | 0.01           | 0.06         | 0.04            | 0.73           | 0.04          | 0.13           | 0.88      | 0.93        | 0.01  | 200        | 0.0          | -0.6         | 2            |
| 28 | chr3R | 20,000           | 1,012,283      | 0.99      | 2         | 101     | 100      | 0.08           | 0.03         | 0.15            | 0.08           | 0.47          | 0.20           | 0.91      | 0.89        | 0.01  | 400        | 0.0          | -0.9         | 3            |
| 29 | chr3R | 68,298           | 1,076,568      | 1.01      | 6         | 107     | 102      | 0.09           | 0.03         | 0.17            | 0.03           | 0.46          | 0.23           | 0.91      | 0.89        | 0.01  | 400        | 0.0          | -0.6         | 3            |
| 30 | chr3R | 1,189,408        | 2,192,628      | 1.00      | 118       | 219     | 102      | 0.02           | 0.00         | 0.22            | 0.07           | 0.00          | 0.70           | 0.92      | 0.91        | 0.01  | 300        | -0.3         | -0.9         | 2            |
| 31 | chr3R | 1,540,632        | 2,547,798      | 1.01      | 154       | 254     | 101      | 0.03           | 0.03         | 0.11            | 0.01           | 0.06          | 0.76           | 0.92      | 0.89        | 0.01  | 300        | 0.0          | -0.9         | 2            |
| 32 | chr3R | 4,627,784        | 5,632,660      | 1.00      | 462       | 563     | 102      | 0.07           | 0.10         | 0.32            | 0.02           | 0.13          | 0.36           | 0.90      | 0.86        | 0.01  | 400        | 0.0          | -0.6         | 3            |
| 33 | chr3R | 4,935,081        | 5,939,573      | 1.00      | 493       | 593     | 101      | 0.05           | 0.09         | 0.30            | 0.02           | 0.18          | 0.37           | 0.90      | 0.88        | 0.01  | 400        | 0.3          | -0.9         | 3            |
| 34 | chr3R | 10,108,917       | 11,125,089     | 1.02      | 1010      | 1112    | 103      | 0.06           | 0.15         | 0.15            | 0.01           | 0.15          | 0.47           | 0.91      | 0.90        | 0.01  | 400        | 0.3          | -0.9         | 3            |
| 35 | chr3R | 11,830,184       | 12,834,808     | 1.00      | 1183      | 1283    | 101      | 0.06           | 0.08         | 0.11            | 0.00           | 0.49          | 0.26           | 0.95      | 0.89        | 0.01  | 400        | -0.3         | -0.6         | 3            |
| 36 | chr3R | 16,737,550       | 17,758,875     | 1.02      | 1673      | 1775    | 103      | 0.13           | 0.14         | 0.13            | 0.00           | 0.27          | 0.34           | 0.87      | 0.85        | 0.01  | 400        | 0.0          | 0.0          | 3            |
| 37 | chr3R | 18,922,749       | 19,929,202     | 1.01      | 1892      | 1992    | 101      | 0.06           | 0.22         | 0.17            | 0.00           | 0.11          | 0.45           | 0.92      | 0.85        | 0.01  | 400        | -0.3         | -0.6         | 3            |
| 38 | chr3R | 19,748,864       | 20,776,661     | 1.03      | 1974      | 2077    | 104      | 0.05           | 0.14         | 0.39            | 0.04           | 0.02          | 0.38           | 0.92      | 0.83        | 0.01  | 400        | -0.3         | -0.6         | 3            |
| 39 | chr3R | 23,123,438       | 24,126,051     | 1.00      | 2312      | 2412    | 101      | 0.01           | 0.00         | 0.13            | 0.00           | 0.05          | 0.81           | 0.94      | 0.89        | 0.01  | 300        | -0.3         | -0.6         | 2            |
| 40 | chr4  | 60,451           | 1,083,771      | 1.02      | 6         | 108     | 102      | 0.03           | 0.06         | 0.01            | 0.51           | 0.20          | 0.20           | 0.87      | 0.88        | 0.01  | 400        | 0.0          | -1.2         | 3            |
| 41 | chrX  | 26,253           | 1,033,981      | 1.01      | 2         | 103     | 102      | 0.05           | 0.05         | 0.15            | 0.01           | 0.31          | 0.43           | 0.95      | 0.89        | 0.01  | 300        | -0.3         | -0.6         | 2            |
| 42 | chrX  | 1,234,758        | 2,243,328      | 1.01      | 123       | 224     | 102      | 0.07           | 0.11         | 0.31            | 0.05           | 0.15          | 0.31           | 0.88      | 0.85        | 0.01  | 400        | 0.0          | -0.9         | 3            |
| 43 | chrX  | 2,348,243        | 3,377,271      | 1.03      | 234       | 337     | 104      | 0.04           | 0.11         | 0.12            | 0.01           | 0.48          | 0.25           | 0.94      | 0.89        | 0.01  | 400        | 0.0          | -0.6         | 3            |
| 44 | chrX  | 2,831,084        | 3,850,088      | 1.02      | 283       | 385     | 103      | 0.06           | 0.17         | 0.06            | 0.00           | 0.44          | 0.27           | 0.95      | 0.89        | 0.01  | 400        | 0.3          | -0.6         | 3            |
| 45 | chrX  | 11,803,883       | 12,972,782     | 1.17      | 1180      | 1297    | 118      | 0.04           | 0.05         | 0.08            | 0.00           | 0.07          | 0.76           | 0.92      | 0.89        | 0.01  | 400        | 0.3          | -0.9         | 3            |
| 46 | chrX  | 13,910,272       | 14,912,855     | 1.00      | 1391      | 1491    | 101      | 0.02           | 0.02         | 0.05            | 0.00           | 0.08          | 0.83           | 0.93      | 0.90        | 0.01  | 300        | -0.3         | -1.2         | 2            |
| 47 | chrX  | 15,340,984       | 16,350,132     | 1.01      | 1534      | 1635    | 102      | 0.06           | 0.01         | 0.42            | 0.06           | 0.24          | 0.21           | 0.92      | 0.89        | 0.01  | 400        | 0.0          | -0.6         | 3            |
| 48 | chrX  | 15,590,302       | 16,600,049     | 1.01      | 1559      | 1660    | 102      | 0.03           | 0.00         | 0.48            | 0.04           | 0.20          | 0.26           | 0.92      | 0.87        | 0.01  | 400        | 0.0          | -0.9         | 3            |
| 49 | chrX  | 19,389,629       | 20,397,756     | 1.01      | 1938      | 2039    | 102      | 0.09           | 0.04         | 0.23            | 0.09           | 0.06          | 0.50           | 0.90      | 0.89        | 0.01  | 400        | -0.3         | -0.3         | 3            |
| 50 | chrX  | 21,107,582       | 22,132,184     | 1.02      | 2110      | 2213    | 103      | 0.06           | 0.00         | 0.11            | 0.37           | 0.11          | 0.36           | 0.96      | 0.88        | 0.01  | 400        | 0.0          | -0.6         | 3            |
