# Supplementary material for: Automatic analysis and 3D-modelling of Hi-C data using TADbit reveals structural features of the fly chromatin colors
Source: PubMed Central journal article supplement (PMC5540598; doi:10.1371/journal.pcbi.1005665), 2017-07-19
Supplement: pcbi.1005665.s009.pdf [file pcbi.1005665.s009.pdf]

#### S4 Text. Serra et al 2015 dataset

All required data and scripts to entirely reproduce the Serra et al 2015 dataset can be downloaded at [http://www.3DGenomes.org/datasets/serra\\_etal](http://www.3DGenomes.org/datasets/serra_etal) (file size: ~300Mb). After you install the necessary software for TADbit to run (see details here: <https://github.com/3DGenomes/TADbit>) as well as the specific software for the dataset (see below), simply run the script "*0\_run\_all.sh*". That script will run all necessary sub-scripts that will execute all the steps for reproducing the Serra et al 2015 dataset. Be aware that the scripts are tested in a Linux Box with 24 CPUs and the final output will require a total of 205Gb of disk space of and will run for about 3 days using 20 CPUs.

Other dependencies for reproducing the Serra et al 2015 Dataset:

- `wget` (<http://www.gnu.org/software/wget/>) to download the SRA files with the reads from the Hou et al 2012 experiment.
- `fastq-dump` program from the SRA-toolkit (<http://www.ncbi.nlm.nih.gov/books/NBK158900/>) to re-format the SRA into FASTQ files.
- All dependencies of TADbit, including GEM ([http://algorithms.cnag.cat/wiki/The\\_GEM\\_library](http://algorithms.cnag.cat/wiki/The_GEM_library)) and IMP (<http://www.integrativemodeling.org>).
